# Supplementary material for: Global gene expression analysis of Escherichia coli K-12 DH5α after exposure to 2.4 GHz wireless fidelity radiation
Source: PubMed Central journal article supplement (PMC6783421; doi:10.1038/s41598-019-51046-7), 2019-10-08
Supplement: 41598_2019_51046_MOESM1_ESM.pdf [file 41598_2019_51046_MOESM1_ESM.pdf]

**Global gene expression analysis of *Escherichia coli* K-12 DH5 $\alpha$  after exposure to 2.4 GHz wireless fidelity radiation.** Ilham H. Said-Salman, Fatima A. Jebaii, Hoda H. Yusef, Mohamed E. Moustafa.

Table S1. Up-regulated genes after exposure to 2.4 GHz Wi-Fi for 5 hours. A single gene may be implicated in more than one GO process.

| Gene names    | Putative function                                                                                                    | GO term                                                                                                                                                                                         |
|---------------|----------------------------------------------------------------------------------------------------------------------|-------------------------------------------------------------------------------------------------------------------------------------------------------------------------------------------------|
| <i>cheR</i>   | Chemotaxis, protein methylation                                                                                      | <b>Chemotaxis (GO:0006935)</b><br><b>Metabolic process (GO:0008152)</b>                                                                                                                         |
| <i>cheY</i>   | Chemotaxis, protein acetylation<br>Signal transduction system                                                        | <b>Bacterial-type flagellum-dependent cell motility ( GO:0071973 )</b><br><b>Chemotaxis (GO:0006935)</b><br><b>Biological regulation ( GO:0065007)</b><br><b>Metabolic process (GO:0008152)</b> |
| <i>motB</i>   | Motility protein B, chemotaxis                                                                                       | <b>Bacterial-type flagellum-dependent cell motility ( GO:0071973 ) and chemotaxis (GO:0006935)</b>                                                                                              |
| <i>fliC</i>   | Flagellin                                                                                                            | <b>Bacterial-type flagellum-dependent cell motility ( GO:0071973 )</b>                                                                                                                          |
| <i>fliT</i>   | Flagellar protein, negative regulation of bacterial-type flagellum assembly, flagellum organization, protein folding | <b>Bacterial-type flagellum-dependent cell motility ( GO:0071973 )</b><br><b>Biological regulation ( GO:0065007)</b>                                                                            |
| <i>fliL</i>   | Flagellar protein, chemotaxis                                                                                        | <b>bacterial-type flagellum-dependent swarming motility ( GO:0071973 )</b><br><b>Chemotaxis (GO:0006935)</b>                                                                                    |
| <i>fliM</i>   | Flagellar motor switch protein, chemotaxis                                                                           | <b>Bacterial-type flagellum-dependent cell motility ( GO:0071973 )</b><br><b>Chemotaxis (GO:0006935)</b>                                                                                        |
| <i>flgG</i>   | Flagellar basal-body rod protein                                                                                     | <b>Bacterial-type flagellum-dependent cell motility ( GO:0071973 )</b>                                                                                                                          |
| <i>fimI</i>   | Fimbrin-like protein, pilus organization                                                                             | <b>Cell adhesion and biofilm (GO:0043709)</b>                                                                                                                                                   |
| <i>pgaD</i>   | Biofilm PGA synthesis protein                                                                                        | <b>Cell adhesion and biofilm (GO:0043709)</b>                                                                                                                                                   |
| <i>yadC</i>   | Fimbrial-like protein, response to DNA damage, pilus organization, response to antibiotic                            | <b>Cell adhesion and biofilm (GO:0043709)</b><br><b>Response to stimulus (GO:0050896)</b>                                                                                                       |
| <i>yadM</i>   | Fimbrial-like protein, pilus organization                                                                            | <b>Cell adhesion and biofilm (GO:0043709)</b>                                                                                                                                                   |
| <i>insH21</i> | Transposase activity, Involved in the transposition of the insertion sequence IS5.                                   | <b>Transposition, DNA-mediated (GO:0006313), Metabolic process (GO:0008152)</b>                                                                                                                 |
| <i>insH1</i>  | Transposase activity, Involved in the transposition of the insertion sequence IS5.                                   | <b>Transposition, DNA-mediated (GO:0006313), Metabolic process (GO:0008152)</b>                                                                                                                 |

|               |                                                                                                     |                                                                                 |
|---------------|-----------------------------------------------------------------------------------------------------|---------------------------------------------------------------------------------|
| <i>insH2</i>  | Transposase activity, Involved in the transposition of the insertion sequence IS5.                  | <b>Transposition, DNA-mediated (GO:0006313), Metabolic process (GO:0008152)</b> |
| <i>insH3</i>  | Transposase activity, Involved in the transposition of the insertion sequence IS5.                  | <b>Transposition, DNA-mediated (GO:0006313), Metabolic process (GO:0008152)</b> |
| <i>insH4</i>  | Transposase activity, Involved in the transposition of the insertion sequence IS5.                  | <b>Transposition, DNA-mediated (GO:0006313), Metabolic process (GO:0008152)</b> |
| <i>insH7</i>  | Transposase activity, Involved in the transposition of the insertion sequence IS5.                  | <b>Transposition, DNA-mediated (GO:0006313), Metabolic process (GO:0008152)</b> |
| <i>insH8</i>  | Transposase activity, Involved in the transposition of the insertion sequence IS5.                  | <b>Transposition, DNA-mediated (GO:0006313), Metabolic process (GO:0008152)</b> |
| <i>insH9</i>  | Transposase activity, Involved in the transposition of the insertion sequence IS5.                  | <b>Transposition, DNA-mediated (GO:0006313), Metabolic process (GO:0008152)</b> |
| <i>insH10</i> | Transposase activity, Involved in the transposition of the insertion sequence IS5.                  | <b>Transposition, DNA-mediated (GO:0006313), Metabolic process (GO:0008152)</b> |
| <i>insH11</i> | Transposase activity, Involved in the transposition of the insertion sequence IS5.                  | <b>Transposition, DNA-mediated (GO:0006313), Metabolic process (GO:0008152)</b> |
| <i>insH12</i> | Transposase activity, Involved in the transposition of the insertion sequence IS5.                  | <b>Transposition, DNA-mediated (GO:0006313), Metabolic process (GO:0008152)</b> |
| <i>oxc</i>    | Response to acidic pH, oxalate catabolic activity                                                   | <b>Response to stimulus (GO:0050896), Metabolic process (GO:0008152)</b>        |
| <i>yjjQ</i>   | Response to methylglyoxal, Regulation of transcription in response to methylglyoxal                 | <b>Response to stimulus (GO:0050896) Biological regulation (GO:0065007)</b>     |
| <i>arsC</i>   | Response to DNA damage stimulus; response to arsenic, Arsenate reductase activity                   | <b>Response to stimulus (GO:0050896) Metabolic process (GO:0008152)</b>         |
| <i>sulA</i>   | Cellular response to DNA damage stimulus; SOS response, Negative regulation of cell division        | <b>Response to stimulus (GO:0050896) Biological regulation (GO:0065007)</b>     |
| <i>sbcB</i>   | DNA repair, Putative phosphotransferase enzyme IIB component                                        | <b>Response to stimulus (GO:0050896) Transport (GO:0006810)</b>                 |
| <i>recT</i>   | DNA renaturation, DNA synthesis Involved in double-strand break repair via homologous recombination | <b>Response to stimulus (GO:0050896) Metabolic process (GO:0008152)</b>         |
| <i>ybhG</i>   | Response to antibiotic                                                                              | <b>Response to stimulus (GO:0050896)</b>                                        |
| <i>ampE</i>   | Response to antibiotic                                                                              | <b>Response to stimulus (GO:0050896)</b>                                        |

|             |                                                                                                                |                                            |
|-------------|----------------------------------------------------------------------------------------------------------------|--------------------------------------------|
| <i>fliA</i> | Sigma factor responsible for initiation of transcription of genes involved in motility and flagellar synthesis | <b>Biological regulation ( GO:0065007)</b> |
| <i>flgM</i> | Anti-sigma factor FlIA , negatively regulates flagellar genes                                                  | <b>Biological regulation ( GO:0065007)</b> |
| <i>puuC</i> | Putrescine catabolic process                                                                                   | <b>Metabolic process (GO:0008152)</b>      |
| <i>eutP</i> | Ethanolamine catabolic process                                                                                 | <b>Metabolic process (GO:0008152)</b>      |
| <i>metC</i> | Methionine biosynthetic process                                                                                | <b>Metabolic process (GO:0008152)</b>      |
| <i>kbaY</i> | Carbohydrate metabolic process                                                                                 | <b>Metabolic process (GO:0008152)</b>      |
| <i>sgcB</i> | Kinase activity                                                                                                | <b>Metabolic process (GO:0008152)</b>      |
| <i>malP</i> | Glycogen catabolic process                                                                                     | <b>Metabolic process (GO:0008152)</b>      |
| <i>malZ</i> | Oligosaccharide catabolic process                                                                              | <b>Metabolic process (GO:0008152)</b>      |
| <i>rhmR</i> | Transcription factor activity                                                                                  | <b>Biological regulation ( GO:0065007)</b> |
| <i>alpA</i> | Biofilm formation<br>Prophage CP4-57 regulatory protein                                                        | <b>Biological regulation ( GO:0065007)</b> |
| <i>ykfJ</i> | Pseudogene                                                                                                     | <b>RNA processing (GO:0006396)</b>         |
| <i>agaR</i> | Repressor for the aga operon for N-acetyl galactosamine transport and metabolism.                              | <b>Biological regulation ( GO:0065007)</b> |
| <i>yhdX</i> | Putative amino-acid ABC transporter permease protein                                                           | <b>Transport (GO:0006810)</b>              |
| <i>agaC</i> | N-acetylgalactosamine permease IIC component 1                                                                 | <b>Transport (GO:0006810)</b>              |
| <i>yehC</i> | Chaperone-mediated protein folding                                                                             | <b>Cell wall organization (GO:0071555)</b> |
| <i>yehR</i> | Lipid-anchor                                                                                                   | <b>Plasma membrane (GO 0005886)</b>        |
| <i>nlpA</i> | Lipid-anchor, plasma membrane methionine transport                                                             | <b>Plasma membrane (GO 0005886)</b>        |
| <i>essQ</i> | Prophage lysis protein                                                                                         | <b>cytolysis ( GO:0019835 )</b>            |

Table S2. Down-regulated genes after exposure to 2.4 GHz Wi-Fi for 5 hours. A single gene may be implicated in more than one GO process.

| Gene names  | Putative function                                              | GO term                                                                                     |
|-------------|----------------------------------------------------------------|---------------------------------------------------------------------------------------------|
| <i>alsC</i> | Carbohydrate transport                                         | <b>Localization and transport (GO:0051179)</b>                                              |
| <i>gadC</i> | Amino acid transport, maintain a near-neutral intracellular pH | <b>Localization and transport (GO:0051179)</b><br><b>Biological regulation( GO:0065007)</b> |
| <i>ompL</i> | Oligosaccharide and ion transport                              | <b>Localization and transport (GO:0051179)</b>                                              |
| <i>ppdB</i> | Protein secretion by the type II secretion system              | <b>Localization and transport (GO:0051179)</b>                                              |
| <i>ssuA</i> | Alkanesulfonate transport, Sulfur compound metabolic process   | <b>Localization and transport (GO:0051179)</b><br><b>Metabolic process (GO:0008152)</b>     |
| <i>xanP</i> | Xanthine transport                                             | <b>Localization and transport (GO:0051179)</b>                                              |

|              |                                                                                                                                  |                                                                                        |
|--------------|----------------------------------------------------------------------------------------------------------------------------------|----------------------------------------------------------------------------------------|
| <i>ycaD</i>  | transmembrane transport                                                                                                          | <b>Localization and transport (GO:0051179)</b>                                         |
| <i>ytfT</i>  | transmembrane transport                                                                                                          | <b>Localization and transport (GO:0051179)</b>                                         |
| <i>insL1</i> | Involved in the transposition of the insertion sequence IS186.                                                                   | <b>Transposition, DNA-mediated process (GO:0006313) Metabolic process (GO:0008152)</b> |
| <i>insL2</i> | Involved in the transposition of the insertion sequence IS186.                                                                   | <b>Transposition, DNA-mediated process (GO:0006313) Metabolic process (GO:0008152)</b> |
| <i>insL3</i> | Involved in the transposition of the insertion sequence IS186.                                                                   | <b>Transposition, DNA-mediated process (GO:0006313) Metabolic process (GO:0008152)</b> |
| <i>pyrI</i>  | Pyrimidine nucleotide biosynthetic process                                                                                       | <b>Metabolic process (GO:0008152)</b>                                                  |
| <i>purE</i>  | 'De novo' IMP biosynthetic process                                                                                               | <b>Metabolic process (GO:0008152)</b>                                                  |
| <i>rimO</i>  | Peptidyl-L-beta-methylthioaspartic acid biosynthetic process from peptidyl-aspartic acid; tRNA modification                      | <b>Metabolic process (GO:0008152)</b>                                                  |
| <i>cobC</i>  | Cobalamin biosynthetic process                                                                                                   | <b>Metabolic process (GO:0008152)</b>                                                  |
| <i>fdnI</i>  | Anaerobic respiration; formate oxidation; respiratory electron transport chain                                                   | <b>Metabolic process (GO:0008152)</b>                                                  |
| <i>fdnH</i>  | Anaerobic respiration; formate oxidation; respiratory electron transport chain                                                   | <b>Metabolic process (GO:0008152)</b>                                                  |
| <i>fdnG</i>  | Anaerobic respiration; formate oxidation; respiratory electron transport chain                                                   | <b>Metabolic process (GO:0008152)</b>                                                  |
| <i>alsK</i>  | D-allose catabolic process                                                                                                       | <b>Metabolic process (GO:0008152)</b>                                                  |
| <i>appB</i>  | Aerobic electron transport chain; oxidative phosphorylation                                                                      | <b>Metabolic process (GO:0008152)</b>                                                  |
| <i>hyi</i>   | Glyoxylate metabolic process                                                                                                     | <b>Metabolic process (GO:0008152)</b>                                                  |
| <i>eutQ</i>  | Ethanolamine catabolic process                                                                                                   | <b>Metabolic process (GO:0008152)</b>                                                  |
| <i>hyaB</i>  | Anaerobic respiration; fermentation                                                                                              | <b>Metabolic process (GO:0008152)</b>                                                  |
| <i>hyaA</i>  | Anaerobic respiration; fermentation                                                                                              | <b>Metabolic process (GO:0008152)</b>                                                  |
| <i>hyaD</i>  | Protein processing                                                                                                               | <b>Metabolic process (GO:0008152)</b>                                                  |
| <i>pyrB</i>  | 'De novo' pyrimidine nucleobase biosynthetic process; cellular amino acid metabolic process; nitrogen compound metabolic process | <b>Metabolic process (GO:0008152)</b>                                                  |
| <i>purN</i>  | 'De novo' IMP biosynthetic process, cellular response to DNA damage stimulus                                                     | <b>Metabolic process (GO:0008152)<br/>Response to stimulus (GO:0050896)</b>            |
| <i>udp</i>   | Uridine catabolic process, cellular response to DNA damage stimulus                                                              | <b>Metabolic process (GO:0008152)<br/>Response to stimulus (GO:0050896)</b>            |
| <i>lpp</i>   | Lipid modification                                                                                                               | <b>Metabolic process (GO:0008152)</b>                                                  |
| <i>yafO</i>  | SOS response, Negative regulation of translation, DNA repair                                                                     | <b>Response to stimulus (GO:0050896)<br/>Biological regulation (GO:0065007)</b>        |

|             |                                            |                                                                           |
|-------------|--------------------------------------------|---------------------------------------------------------------------------|
|             |                                            | <b>Metabolic process (GO:0008152)</b>                                     |
| <i>yjiE</i> | Regulation of transcription, DNA-templated | <b>Biological regulation( GO:0065007)</b>                                 |
| <i>yadV</i> | Probable fimbrial chaperone                | <b>Cell adhesion (GO:0071555)</b>                                         |
| <i>yciG</i> | Flagellum-dependent swarming motility      | <b>Bacterial-type flagellum-dependent swarming motility ( GO:0071978)</b> |
| <i>yidG</i> | Inner membrane protein                     | <b>integral component of membrane (GO:0016021)</b>                        |
| <i>yddB</i> | Pseudogene                                 | <b>integral component of membrane (GO:0016021)</b>                        |
| <i>appX</i> | Part of cytochrome bd-II oxidase           | <b>Plasma membrane (GO:0005886)</b>                                       |
| <i>zapA</i> | Activator of cell division                 | <b>Cell division (GO:0000917)</b>                                         |
| <i>ldrA</i> | Toxic component                            | <b>Plasma membrane (GO:0005886)</b>                                       |
| <i>ldrB</i> | Toxic component                            | <b>Plasma membrane (GO:0005886)</b>                                       |
| <i>ldrC</i> | Toxic component                            | <b>Plasma membrane (GO:0005886)</b>                                       |
| <i>yqhh</i> | Peptidoglycan binding, cell outer membrane | <b>intrinsic component of cell outer membrane (GO:0031230)</b>            |

Table S3. QRT-PCR primer sets used in this study and their target genes.

| Gene name    | Forward primer          | Reverse primer        | Amplicon size |
|--------------|-------------------------|-----------------------|---------------|
| <i>pgaD</i>  | TTACGACCCGACAATCACCCAG  | GCCAGTAATAACCCGTCAGCA | 123           |
| <i>fliC</i>  | ATTCCGTTCTTCCTCGGTG     | TGGACACTTCGGTCGCATAG  | 131           |
| <i>cheY</i>  | AGTGCGTAACTGCTGAAAGA    | AAATCCATAACCGCCTGCCT  | 100           |
| <i>malP</i>  | TCGGCTATCGTAATGGCGTG    | TTCGGCACGCAAGAAATCAC  | 107           |
| <i>malZ</i>  | CAGGTGCTGTATGCCGAAGA    | CACGGCATTGAGAAACGGTG  | 132           |
| <i>motB</i>  | GAATGATGGTCGGAGGGTT     | GCCTGTTCGGCTTGTGTTTC  | 146           |
| <i>alsC</i>  | AACTGATGTTGGCAGGTGTTG   | AGGGTGATGATGAACGGGTG  | 130           |
| <i>alsK</i>  | CGATCTTTTCGTCATGCGG     | GAAGGCGGGCATATCCATCA  | 142           |
| <i>appB</i>  | CGACGGATTGACATGGGGA     | AAATAATGCCCCACCAAGCGA | 142           |
| <i>appX</i>  | GTATTTACTTTGGTTCGTCGGCA | GGTCCAGCCATACCAACACA  | 71            |
| <i>gyrA*</i> | GTCGTGGCGGAAAGGTAAA     | CGGCTGGAGAAGCACAGAA   | 106           |
| <i>frr*</i>  | GATCTTGGCCTGAACCCGAA    | CTGCTTCACCACGAACGATTT | 109           |

\*housekeeping genes
